# Supplementary material for: Diversity and functional analysis of epiphytic and endophytic bacteria in three different parts of Brasenia schreberi
Source: Research Square preprint supplement (doi:10.21203/rs.3.rs-7831565/v1), 2025-10-29
Supplement: Supplementary file 1 [file f105c55be36a46512cfa4e83.xlsx]

## Sheet: Table S1
Class1	Class2	Class3_name	YP1	YP2	YP3	YP4	YP5	YP6	YP11	YP12	YP13	YP14	YP15	YP16	YP21	YP22	YP23	YP24	YP25	YP26
Human Diseases	Drug resistance: Antineoplastic	EGFR tyrosine kinase inhibitor resistance	0	0	0	0	247	12	0	0	0	0	0	23	0	0	0	5	0	0
Genetic Information Processing	Translation	mRNA surveillance pathway	0	0	0	0	515	34	0	0	0	0	0	58	0	0	0	24	0	0
Genetic Information Processing	Replication and repair	Fanconi anemia pathway	0	0	0	0	843	50	0	0	0	0	0	115	0	0	0	25	0	0
Cellular Processes	Cell growth and death	Cell cycle	0	0	0	0	247	12	0	0	0	0	0	23	0	0	0	5	0	0
Genetic Information Processing	Folding, sorting and degradation	SNARE interactions in vesicular transport	0	0	0	0	247	12	0	0	0	0	0	23	0	0	0	5	0	0
Cellular Processes	Transport and catabolism	Phagosome	0	0	0	0	298	19	0	0	0	0	0	46	0	0	0	10	0	0
Environmental Information Processing	Signal transduction	mTOR signaling pathway	0	0	0	0	247	12	0	0	0	0	0	23	0	0	0	5	0	0
Organismal Systems	Immune system	Cytosolic DNA-sensing pathway	0	0	0	0	51	7	0	0	0	0	0	23	0	0	0	5	0	0
Organismal Systems	Endocrine system	Oxytocin signaling pathway	0	0	0	0	247	12	0	0	0	0	0	23	0	0	0	5	0	0
Human Diseases	Infectious diseases: Viral	Hepatitis C	0	0	0	0	247	12	0	0	0	0	0	23	0	0	0	5	0	0
Human Diseases	Infectious diseases: Viral	Measles	0	0	0	0	247	12	0	0	0	0	0	23	0	0	0	5	0	0
Human Diseases	Infectious diseases: Viral	Human T-cell leukemia virus 1 infection	0	0	0	0	494	24	0	0	0	0	0	46	0	0	0	10	0	0
Human Diseases	Infectious diseases: Viral	Epstein-Barr virus infection	0	0	0	0	996	71	0	0	0	0	0	184	0	0	0	40	0	0
Human Diseases	Cancers: Specific types	Pancreatic cancer	0	0	0	0	51	7	0	0	0	0	0	23	0	0	0	5	0	0
Metabolism	Lipid metabolism	Steroid hormone biosynthesis	0	0	20	0	0	0	0	0	90	0	11	0	0	0	4	0	0	31
Organismal Systems	Immune system	Hematopoietic cell lineage	0	46	11	0	0	3	6	30	9	0	0	0	0	31	7	0	0	0
Environmental Information Processing	Signal transduction	Ras signaling pathway	138	112	101	0	0	0	24	37	20	0	0	0	52	83	31	0	0	0
Environmental Information Processing	Signal transduction	cGMP-PKG signaling pathway	893	723	614	0	0	0	208	252	160	0	0	0	560	558	438	0	0	0
Environmental Information Processing	Signal transduction	Plant hormone signal transduction	123	71	51	0	0	0	40	89	29	0	0	0	251	185	155	0	0	0
Environmental Information Processing	Signaling molecules and interaction	Neuroactive ligand-receptor interaction	83	57	53	0	0	0	27	68	23	0	0	0	210	164	140	0	0	0
Cellular Processes	Transport and catabolism	Endocytosis	138	112	101	0	0	0	24	37	20	0	0	0	52	83	31	0	0	0
Organismal Systems	Circulatory system	Adrenergic signaling in cardiomyocytes	893	723	614	0	0	0	208	252	160	0	0	0	560	558	438	0	0	0
Organismal Systems	Development	Osteoclast differentiation	74	45	40	0	0	0	9	5	7	0	0	0	31	40	31	0	0	0
Organismal Systems	Immune system	Fc gamma R-mediated phagocytosis	138	112	101	0	0	0	24	37	20	0	0	0	52	83	31	0	0	0
Organismal Systems	Endocrine system	Insulin secretion	893	723	614	0	0	0	208	252	160	0	0	0	560	558	438	0	0	0
Organismal Systems	Endocrine system	GnRH signaling pathway	138	112	101	0	0	0	24	37	20	0	0	0	52	83	31	0	0	0
Organismal Systems	Endocrine system	Thyroid hormone signaling pathway	893	723	614	0	0	0	208	252	160	0	0	0	560	558	438	0	0	0
Organismal Systems	Excretory system	Aldosterone-regulated sodium reabsorption	893	723	614	0	0	0	208	252	160	0	0	0	560	558	438	0	0	0
Organismal Systems	Excretory system	Endocrine and other factor-regulated calcium reabsorption	893	731	624	0	0	0	228	282	182	0	0	0	560	573	438	0	0	0
Organismal Systems	Digestive system	Gastric acid secretion	893	723	614	0	0	0	208	252	160	0	0	0	560	558	438	0	0	0
Organismal Systems	Digestive system	Pancreatic secretion	976	780	667	0	0	0	235	320	183	0	0	0	770	722	578	0	0	0
Organismal Systems	Digestive system	Fat digestion and absorption	93	58	62	0	0	0	23	18	10	0	0	0	76	41	45	0	0	0
Human Diseases	Immune diseases	Rheumatoid arthritis	74	45	40	0	0	0	9	5	7	0	0	0	31	40	31	0	0	0
Environmental Information Processing	Signal transduction	Wnt signaling pathway	18	28	28	0	0	1	0	12	0	0	0	8	391	205	244	0	1	0
Environmental Information Processing	Signal transduction	Notch signaling pathway	18	28	28	0	0	1	0	12	0	0	0	8	391	205	244	0	1	0
Human Diseases	Cancers: Specific types	Chronic myeloid leukemia	18	28	28	0	0	1	0	12	0	0	0	8	391	205	244	0	1	0
Metabolism	Glycan biosynthesis and metabolism	Various types of N-glycan biosynthesis	3	3	3	0	247	12	5	0	6	0	0	23	29	24	25	5	0	0
Organismal Systems	Digestive system	Bile secretion	5934	5487	4347	7	203	17	1359	1982	1194	0	0	3	4971	4751	4138	0	0	0
Metabolism	Lipid metabolism	Fatty acid elongation	450	378	411	1	3	0	163	280	130	0	0	0	836	774	759	2	1	6
Metabolism	Biosynthesis of other secondary metabolites	Flavonoid biosynthesis	203	178	195	1	2	0	49	102	50	0	0	0	406	426	440	2	1	4
Organismal Systems	Nervous system	Retrograde endocannabinoid signaling	2900	2474	2416	16	27	30	616	916	553	0	0	0	1747	1677	1473	4	9	0
Organismal Systems	Endocrine system	Melanogenesis	72	65	56	0	34	15	62	103	229	10	0	25	48	61	29	8	0	0
Metabolism	Biosynthesis of other secondary metabolites	Caffeine metabolism	152	233	102	0	4	4	28	102	30	0	8	8	581	461	389	0	10	5
Environmental Information Processing	Signal transduction	Sphingolipid signaling pathway	1699	1591	1647	0	10	13	434	548	528	1	0	0	2926	2899	2607	19	38	12
Organismal Systems	Endocrine system	Renin secretion	10280	9445	8319	62	48	82	2264	3210	1882	0	0	11	9162	8943	7745	22	26	14
Human Diseases	Infectious diseases: Bacterial	Bacterial invasion of epithelial cells	169	175	200	32	74	29	423	564	945	0	266	0	184	210	354	140	322	298
Human Diseases	Infectious diseases: Bacterial	Pathogenic Escherichia coli infection	10	5	8	2	5	2	6	9	21	0	19	0	4	9	9	10	23	21
Human Diseases	Infectious diseases: Bacterial	Shigellosis	120	95	96	24	60	24	127	178	492	0	228	0	78	108	178	120	276	252
Human Diseases	Cardiovascular diseases	Hypertrophic cardiomyopathy (HCM)	10280	9445	8319	62	48	82	2264	3210	1882	0	0	11	9162	8943	7745	22	26	14
Metabolism	Biosynthesis of other secondary metabolites	Staurosporine biosynthesis	43324	39173	34834	190	107	251	13666	18565	10126	0	40	56	39227	39334	33394	68	24	10
Human Diseases	Infectious diseases: Bacterial	Vibrio cholerae infection	1319	1612	1166	2	32	30	475	793	1148	14	15	0	1308	1549	1311	15	4	36
Human Diseases	Immune diseases	Systemic lupus erythematosus	2313	2158	1842	1	3	1	913	1335	657	7	6	3	2211	2013	1872	4	8	0
Metabolism	Carbohydrate metabolism	Glycolysis / Gluconeogenesis	1703012	1577415	1389722	18187	41462	35761	1047158	1321140	774882	16976	17446	18773	1641853	1654071	1434051	26461	28065	17576
Metabolism	Carbohydrate metabolism	Citrate cycle (TCA cycle)	1341754	1231795	1083282	13538	30354	26016	786511	995583	586614	11674	10648	13341	1261775	1266100	1095929	19347	20181	11958
Metabolism	Carbohydrate metabolism	Pentose phosphate pathway	1160657	1076457	934945	12500	26443	23537	732924	924317	537495	11513	12528	12566	1121178	1120281	973653	17363	19110	12610
Metabolism	Carbohydrate metabolism	Pentose and glucuronate interconversions	521906	481527	428928	5403	9147	8857	314590	398379	234989	4625	4699	5008	474026	474390	413063	6013	7639	5420
Metabolism	Carbohydrate metabolism	Fructose and mannose metabolism	630272	590517	519659	7225	16074	13746	424206	530198	312548	7077	8660	7763	642599	642193	564270	10426	11194	8990
Metabolism	Carbohydrate metabolism	Galactose metabolism	526992	498617	437342	6502	12794	11680	345669	443990	260462	6522	7948	6835	525579	528585	465473	8811	10043	8523
Metabolism	Carbohydrate metabolism	Ascorbate and aldarate metabolism	373812	342536	297885	3502	6261	6359	210276	273170	160055	3003	2616	3077	306224	311534	263567	3943	5409	2919
Metabolism	Lipid metabolism	Fatty acid biosynthesis	1208448	1110805	977415	12055	23329	23161	771259	967399	560204	10803	9538	11966	1136163	1144617	987778	16745	18986	11243
Metabolism	Lipid metabolism	Fatty acid degradation	1350413	1235662	1097104	12773	21790	23183	771899	978567	580076	9541	7865	11200	1096722	1130185	954572	15237	19693	10463
Metabolism	Lipid metabolism	Synthesis and degradation of ketone bodies	519299	473007	422226	4963	7945	8454	301698	382282	222628	3252	2800	3827	402602	416521	349429	5093	6457	3274
Metabolism	Lipid metabolism	Steroid biosynthesis	2720	2431	2331	23	52	35	865	1102	1207	45	23	13	9661	8460	8053	60	16	26
Metabolism	Lipid metabolism	Primary bile acid biosynthesis	17998	16110	15339	256	215	349	8087	11199	6494	79	102	111	13728	14620	12298	170	320	140
Metabolism	Lipid metabolism	Secondary bile acid biosynthesis	5403	5763	4834	45	296	244	10469	11952	6607	120	200	156	4944	5717	4884	179	93	162
Metabolism	Metabolism of cofactors and vitamins	Ubiquinone and other terpenoid-quinone biosynthesis	543077	498480	431480	5253	10214	9507	381747	480120	276381	4814	3977	5049	544745	539435	466203	6933	7545	4428
Metabolism	Energy metabolism	Oxidative phosphorylation	2729715	2501834	2195733	26715	54203	50365	1745219	2186903	1260117	23169	21511	25677	2645409	2637202	2282346	36483	38980	22885
Metabolism	Energy metabolism	Photosynthesis	525722	485221	426385	6014	11708	10969	316715	392191	238483	6005	5973	5215	757334	719176	643232	9427	7880	5786
Metabolism	Energy metabolism	Photosynthesis - antenna proteins	7074	6984	4660	276	600	384	2268	1920	4128	516	276	156	78300	67820	63530	720	192	312
Metabolism	Amino acid metabolism	Arginine biosynthesis	934975	867274	753411	9752	21316	18271	670197	836783	480948	8903	8352	9821	876892	886815	762882	12668	14039	8725
Metabolism	Nucleotide metabolism	Purine metabolism	3691968	3413191	2979146	36849	77444	67800	2341128	2954857	1709174	32072	33844	35481	3501695	3522955	3039116	47628	52380	32762
Metabolism	Nucleotide metabolism	Pyrimidine metabolism	2517462	2331684	2039449	25149	56176	47316	1605163	2018126	1161981	22126	24237	24707	2407880	2422925	2093983	34311	36593	23446
Metabolism	Amino acid metabolism	Alanine, aspartate and glutamate metabolism	1446210	1340837	1167731	14065	31316	26576	991597	1232115	707867	13129	13430	14500	1364496	1372751	1185994	19066	20295	13295
Metabolism	Metabolism of terpenoids and polyketides	Tetracycline biosynthesis	253130	233283	205849	2569	4442	4476	161782	203397	118227	2057	1491	2145	244772	244774	212953	3142	3353	2009
Metabolism	Amino acid metabolism	Glycine, serine and threonine metabolism	1730685	1597558	1398323	17242	35281	32726	1170770	1469152	848492	15900	15086	17967	1560032	1581039	1358288	22520	25013	14930
Metabolism	Biosynthesis of other secondary metabolites	Monobactam biosynthesis	453999	418399	366502	4635	9749	8721	289283	363254	212072	4229	4060	4610	429437	430831	372149	6062	7317	4472
Metabolism	Amino acid metabolism	Cysteine and methionine metabolism	1678452	1550666	1359288	16138	34116	30896	1091173	1369699	794777	14681	13547	16289	1582968	1596110	1374141	21565	23597	14560
Metabolism	Amino acid metabolism	Valine, leucine and isoleucine degradation	1895853	1729381	1536809	17712	30541	31951	1109018	1406411	818802	13400	10950	15757	1563614	1605484	1356829	20263	24730	12715
Metabolism	Metabolism of terpenoids and polyketides	Geraniol degradation	549668	497467	445301	4800	7398	8349	303559	386000	233523	3207	2577	3877	443828	456114	383127	5114	7200	3537
Metabolism	Amino acid metabolism	Valine, leucine and isoleucine biosynthesis	892834	816857	725175	8915	20427	17144	523952	663819	392229	7931	7937	9027	859248	861867	746033	12700	13751	8616
Metabolism	Amino acid metabolism	Lysine biosynthesis	947364	875501	769442	9611	21213	18439	618334	773159	448405	8687	8677	9786	876761	885499	763631	12934	14239	9027
Metabolism	Amino acid metabolism	Lysine degradation	939003	858849	765452	9254	15998	16674	549642	696905	408542	6940	5411	8045	762820	786159	665692	10678	13028	6721
Metabolism	Biosynthesis of other secondary metabolites	Penicillin and cephalosporin biosynthesis	32742	29518	25825	191	352	347	16963	22453	13406	260	204	260	28852	28341	24128	214	260	113
Metabolism	Amino acid metabolism	Arginine and proline metabolism	1323915	1227317	1066754	12176	23072	22402	845059	1058910	619395	11282	9693	12127	1187885	1205232	1024788	14519	17246	9817
Metabolism	Biosynthesis of other secondary metabolites	Carbapenem biosynthesis	115987	106150	94491	1215	2226	2254	71170	89730	52608	1052	1101	1089	119193	118421	103472	1653	1610	1078
Metabolism	Amino acid metabolism	Histidine metabolism	1020877	939804	821632	9524	20125	17938	618805	783496	456450	8430	7484	9333	932378	940339	807919	12480	13418	7870
Metabolism	Amino acid metabolism	Tyrosine metabolism	865175	796731	686578	7434	13154	13273	650779	803460	457673	6692	5688	6965	698409	713428	597280	8148	11100	5907
Metabolism	Amino acid metabolism	Phenylalanine metabolism	1283590	1170424	1027457	11694	20412	21422	800013	1015843	588192	9830	7940	10628	1040967	1064764	894652	13256	17590	9107
Metabolism	Xenobiotics biodegradation and metabolism	Chlorocyclohexane and chlorobenzene degradation	247585	224614	196349	2383	4164	4448	134408	174456	102979	1970	1608	2249	203134	206207	174120	2808	4042	2108
Metabolism	Xenobiotics biodegradation and metabolism	Benzoate degradation	1357722	1233352	1088567	12591	20312	22026	846810	1074205	627344	9767	7515	10796	1028503	1062703	886896	13108	17554	8626
Metabolism	Xenobiotics biodegradation and metabolism	Fluorobenzoate degradation	164676	150854	127667	1173	1983	2163	87759	112962	68557	1060	945	1084	132747	133656	113260	1450	2314	1192
Metabolism	Amino acid metabolism	Tryptophan metabolism	1106881	1012018	895405	10512	17511	18546	657171	835713	484250	7906	6172	9056	904500	927835	782857	11785	15553	7886
Metabolism	Amino acid metabolism	Phenylalanine, tyrosine and tryptophan biosynthesis	1344270	1235550	1088759	13095	30242	25095	875351	1096787	634703	11609	12097	13088	1275380	1278173	1106981	17608	18279	11584
Metabolism	Biosynthesis of other secondary metabolites	Novobiocin biosynthesis	255661	236113	204527	2400	5364	4530	173279	217366	123433	2201	2166	2394	222442	225832	192555	2973	3274	1968
Metabolism	Metabolism of other amino acids	beta-Alanine metabolism	765965	702371	617053	6824	12445	12761	471738	595257	346069	5895	4616	6520	655856	669981	565766	8529	10432	5514
Metabolism	Metabolism of other amino acids	Taurine and hypotaurine metabolism	285039	265075	228377	2713	5351	5481	206825	255641	145869	2859	2682	3102	256357	259161	221771	3867	4603	2742
Metabolism	Metabolism of other amino acids	Phosphonate and phosphinate metabolism	155333	144386	123674	1806	3671	3559	126020	154889	88788	1659	1461	1791	135239	138782	118041	2301	3146	1856
Metabolism	Metabolism of other amino acids	Selenocompound metabolism	613729	567461	497663	5908	12305	11196	389896	488822	282845	5241	5108	6011	569889	574869	496095	8238	9222	5671
Metabolism	Metabolism of other amino acids	Cyanoamino acid metabolism	396050	363447	315340	3299	6345	6051	227091	284178	164011	2994	2779	3303	362775	360679	312118	4453	5086	3577
Metabolism	Metabolism of other amino acids	D-Glutamine and D-glutamate metabolism	307743	284553	248095	3015	6309	5770	186148	235942	137435	2711	3126	2945	304556	305281	263970	4221	4269	2670
Metabolism	Metabolism of other amino acids	D-Arginine and D-ornithine metabolism	32614	29497	25350	317	643	674	20509	27114	15035	336	230	346	28011	29115	24011	377	460	234
Metabolism	Metabolism of other amino acids	D-Alanine metabolism	159315	148742	128947	1599	3233	3127	105680	132699	76710	1520	1653	1618	157077	158568	136357	2205	2237	1412
Metabolism	Metabolism of other amino acids	Glutathione metabolism	1232634	1124097	984581	11391	19759	20579	733613	932242	538329	9404	8129	9984	1087602	1100541	935159	12809	15030	7920
Metabolism	Carbohydrate metabolism	Starch and sucrose metabolism	1036329	960960	854796	11828	22988	21474	609226	775232	457983	10606	11269	11354	1053863	1046377	923149	16721	19525	14092
Metabolism	Glycan biosynthesis and metabolism	N-Glycan biosynthesis	31105	28510	26075	372	1642	776	14056	17168	10097	327	417	533	34646	33086	29943	833	841	576
Metabolism	Glycan biosynthesis and metabolism	Other glycan degradation	46763	45770	39347	206	574	364	28543	33755	22910	522	837	554	61816	58004	54322	447	673	1522
Metabolism	Carbohydrate metabolism	Amino sugar and nucleotide sugar metabolism	1620121	1502994	1314478	17230	34515	31305	1083759	1366449	780384	15880	17550	17081	1587243	1587457	1380582	22720	24375	17042
Metabolism	Biosynthesis of other secondary metabolites	Streptomycin biosynthesis	477121	438116	383807	5330	11826	9865	333932	418458	238048	4865	5311	5372	466440	463984	405145	7436	7941	5434
Metabolism	Metabolism of terpenoids and polyketides	Polyketide sugar unit biosynthesis	251664	228905	201080	2443	6292	4912	164714	204865	117834	2362	2863	2623	248591	245197	214737	3843	4155	2920
Metabolism	Biosynthesis of other secondary metabolites	Neomycin, kanamycin and gentamicin biosynthesis	73031	67136	58474	796	1452	1438	42621	54905	31226	680	780	746	71863	71897	62282	1065	1137	792
Metabolism	Biosynthesis of other secondary metabolites	Acarbose and validamycin biosynthesis	132096	120347	105543	1262	3474	2502	87369	107711	61369	1189	1420	1388	132746	129201	114271	2072	2153	1460
Metabolism	Glycan biosynthesis and metabolism	Glycosaminoglycan degradation	76448	69899	60718	672	1245	1281	46794	59883	35577	660	827	748	70857	70616	61278	869	1136	1066
Metabolism	Glycan biosynthesis and metabolism	Lipopolysaccharide biosynthesis	867746	787992	671550	6318	11676	11863	598073	750233	418986	6265	5393	6480	822995	809869	696077	7834	9496	5349
Metabolism	Glycan biosynthesis and metabolism	Peptidoglycan biosynthesis	1093726	1012053	890539	10988	21288	20932	672199	846186	491992	9649	10781	10669	1064042	1069677	926319	15156	15548	9965
Metabolism	Lipid metabolism	Glycerolipid metabolism	530922	495515	432389	5251	10166	9828	331098	419463	245902	4780	4153	5203	501876	505526	437747	7038	7214	4712
Metabolism	Carbohydrate metabolism	Inositol phosphate metabolism	381292	356169	309129	5073	9244	8248	336502	418113	233671	4268	4048	4526	340375	346327	296757	5410	5880	3426
Metabolism	Lipid metabolism	Glycerophospholipid metabolism	1149997	1060036	921931	10681	21122	20160	741855	944094	538733	9449	8911	10304	1019898	1034721	884013	13529	15507	9375
Metabolism	Lipid metabolism	Ether lipid metabolism	43196	39907	33288	192	401	438	16942	23397	15195	234	180	183	36166	36379	30157	169	260	91
Metabolism	Lipid metabolism	Arachidonic acid metabolism	106894	97210	83678	748	1188	1395	59875	76660	44479	601	517	667	86930	89065	73830	759	1089	553
Metabolism	Lipid metabolism	Linoleic acid metabolism	26184	23601	20648	141	203	271	11517	15526	10210	97	100	92	22028	21963	18833	150	224	89
Metabolism	Lipid metabolism	alpha-Linolenic acid metabolism	106061	96736	83534	802	1162	1243	63457	80462	45845	513	462	566	80455	82889	69046	959	1126	588
Metabolism	Lipid metabolism	Sphingolipid metabolism	63393	59238	52229	442	948	803	36158	45625	28998	578	854	716	70708	67924	63014	881	1354	1576
Metabolism	Glycan biosynthesis and metabolism	Glycosphingolipid biosynthesis - globo and isoglobo series	26598	24626	21995	248	416	349	15683	19622	12563	248	424	295	30338	28343	26694	347	446	777
Metabolism	Glycan biosynthesis and metabolism	Glycosphingolipid biosynthesis - ganglio series	9367	8876	7330	3	66	35	4755	5363	4303	73	160	77	12045	11243	10135	68	129	357
Metabolism	Carbohydrate metabolism	Pyruvate metabolism	2266969	2093288	1835889	23164	49685	44652	1411666	1783867	1044879	20834	18783	22789	2097997	2121131	1827114	31749	34732	20741
Metabolism	Xenobiotics biodegradation and metabolism	Dioxin degradation	117412	107885	93458	959	1684	1875	99164	123695	68177	1088	837	1155	86719	89713	74333	949	1150	559
Metabolism	Xenobiotics biodegradation and metabolism	Xylene degradation	159114	147322	125542	1262	2255	2498	118977	151166	88294	1308	1092	1351	120002	122241	102719	1403	2059	1021
Metabolism	Xenobiotics biodegradation and metabolism	Toluene degradation	169824	153673	133627	1183	2094	2207	87515	111500	65274	1093	791	1179	136858	137931	116435	1493	1959	975
Metabolism	Xenobiotics biodegradation and metabolism	Polycyclic aromatic hydrocarbon degradation	138139	123915	108747	1469	1753	2080	107690	135056	74459	1112	899	1176	94082	97222	79540	889	1431	626
Metabolism	Xenobiotics biodegradation and metabolism	Chloroalkane and chloroalkene degradation	368054	341339	298732	4120	7756	7672	233278	296769	174703	3805	2898	4125	309176	318866	270414	4979	6196	3376
Metabolism	Xenobiotics biodegradation and metabolism	Naphthalene degradation	158243	147388	125176	1704	3040	3115	124177	153180	88013	1580	1388	1707	133202	136120	115248	1964	2645	1495
Metabolism	Xenobiotics biodegradation and metabolism	Aminobenzoate degradation	670245	605151	541586	6334	9158	10397	393477	499312	290611	4307	3844	4998	540108	551109	461862	6414	9449	4636
Metabolism	Carbohydrate metabolism	Glyoxylate and dicarboxylate metabolism	2650991	2417192	2118436	25237	48760	48290	1654725	2097995	1200580	21379	18163	24125	2283468	2323742	1974181	31560	36377	20236
Metabolism	Xenobiotics biodegradation and metabolism	Nitrotoluene degradation	192553	176796	149440	1359	4994	3338	137951	171869	97748	1987	1968	2069	158324	163165	134859	2457	3052	1804
Metabolism	Carbohydrate metabolism	Propanoate metabolism	1807713	1661761	1463353	17396	34497	32961	1137349	1434212	833781	14560	12641	16499	1583845	1613308	1376159	22397	26017	14683
Metabolism	Xenobiotics biodegradation and metabolism	Ethylbenzene degradation	91721	83892	70979	587	920	955	54632	68906	38672	413	347	455	69364	71112	59002	740	840	437
Metabolism	Xenobiotics biodegradation and metabolism	Styrene degradation	278846	255543	226251	2526	4642	4940	180837	228696	132979	2232	1703	2654	241270	244732	206864	3165	4740	2345
Metabolism	Carbohydrate metabolism	Butanoate metabolism	1886718	1734943	1527669	18178	36721	34943	1185643	1496139	869802	15480	13400	17229	1566633	1611367	1363042	22440	26491	14809
Metabolism	Carbohydrate metabolism	C5-Branched dibasic acid metabolism	554526	505774	449510	5438	12793	10481	331749	418736	246002	4646	4759	5557	512323	515510	445570	7535	8118	5020
Metabolism	Metabolism of cofactors and vitamins	One carbon pool by folate	998408	923661	817724	10261	22731	19946	624043	780856	455526	9175	10322	10263	980456	983399	858020	14777	14924	10074
Metabolism	Energy metabolism	Methane metabolism	1437520	1319031	1154649	14250	46400	29215	926689	1165444	672352	13511	12355	15275	1317022	1336922	1144344	21188	23583	14216
Metabolism	Energy metabolism	Carbon fixation in photosynthetic organisms	852784	785910	690616	9022	19073	17701	539969	681064	392180	8261	9381	9081	836711	840016	727508	12602	13626	8591
Metabolism	Energy metabolism	Carbon fixation pathways in prokaryotes	1825493	1681625	1480527	18145	41081	36124	1125528	1416153	829221	16461	15532	18875	1655274	1681712	1443514	25671	27223	16596
Metabolism	Metabolism of cofactors and vitamins	Thiamine metabolism	515122	476459	420368	5165	11933	9995	319293	401462	235765	4685	4598	5031	500135	503503	436834	6993	7282	4849
Metabolism	Metabolism of cofactors and vitamins	Riboflavin metabolism	392789	362991	314189	3723	8655	7068	270954	336777	193141	3450	3530	3825	363694	365899	314829	4811	5240	3160
Metabolism	Metabolism of cofactors and vitamins	Vitamin B6 metabolism	314845	289403	256039	3179	7113	6161	198272	247457	146509	2837	2726	3334	300970	301640	262400	4521	4851	3011
Metabolism	Metabolism of cofactors and vitamins	Nicotinate and nicotinamide metabolism	999829	923540	807794	10014	21080	18869	673643	844030	489451	9200	9285	9851	946310	953787	821796	13595	14593	9036
Metabolism	Metabolism of cofactors and vitamins	Pantothenate and CoA biosynthesis	1005258	922537	816602	9906	21628	19247	593680	747987	439880	8830	9392	9950	971918	973851	843435	14299	15866	9800
Metabolism	Metabolism of cofactors and vitamins	Biotin metabolism	851754	784345	678716	7987	16355	15843	581421	728153	416971	7685	6678	8463	795592	803054	688332	11115	12680	7538
Metabolism	Metabolism of cofactors and vitamins	Lipoic acid metabolism	121862	111393	97618	1209	2425	2311	73509	92849	54917	1120	1132	1224	133067	130086	114090	1865	1707	1085
Metabolism	Metabolism of cofactors and vitamins	Folate biosynthesis	926296	849056	741761	9053	17879	16512	563965	711882	412541	7250	6818	8227	885900	885493	764610	11637	12720	7469
Metabolism	Xenobiotics biodegradation and metabolism	Atrazine degradation	153130	140954	119974	1560	2675	2832	118776	150132	83917	1382	1038	1410	128078	132132	110030	1617	2252	1226
Metabolism	Metabolism of cofactors and vitamins	Retinol metabolism	112633	104274	90480	1407	2335	2436	72461	91475	55302	1088	1016	1231	97149	99447	84607	1601	2320	1225
Metabolism	Metabolism of cofactors and vitamins	Porphyrin and chlorophyll metabolism	1813030	1676047	1438279	16393	38877	32441	1237691	1558927	878797	16783	13051	18063	1716950	1733482	1478443	22082	22338	13120
Metabolism	Metabolism of terpenoids and polyketides	Terpenoid backbone biosynthesis	991729	910834	805958	9871	20024	18384	587268	742925	431316	7950	8302	9013	916024	924239	797175	13005	13931	8460
Metabolism	Metabolism of terpenoids and polyketides	Limonene and pinene degradation	312760	285732	258295	3364	5372	5770	167521	213353	128252	2290	1781	2812	256630	265735	224707	3869	5133	2615
Metabolism	Metabolism of terpenoids and polyketides	Carotenoid biosynthesis	117403	109064	96123	1268	1938	1973	79647	98090	55863	1024	752	947	119470	118805	103023	1479	1399	763
Metabolism	Metabolism of terpenoids and polyketides	Zeatin biosynthesis	60440	55800	49462	598	1150	1137	37363	46213	26997	522	630	574	59457	59380	51752	845	845	576
Metabolism	Metabolism of terpenoids and polyketides	Sesquiterpenoid and triterpenoid biosynthesis	7863	7058	6667	74	148	103	3350	3966	3517	133	99	71	23675	20797	19481	178	178	126
Metabolism	Energy metabolism	Nitrogen metabolism	992237	913693	785388	8667	17408	16570	710677	894849	503366	8492	6990	9020	878065	893095	754376	10827	12541	7350
Metabolism	Energy metabolism	Sulfur metabolism	1238500	1138049	989306	11797	22235	21731	830021	1043689	599261	10604	8468	11593	1136411	1147289	980927	14556	17029	9658
Metabolism	Xenobiotics biodegradation and metabolism	Caprolactam degradation	236504	216924	194953	2392	4034	4443	131946	169048	103794	1809	1406	2114	193949	199362	168847	2919	4170	2098
Metabolism	Biosynthesis of other secondary metabolites	Phenylpropanoid biosynthesis	93646	86186	75371	684	1222	1025	43249	53207	31397	571	642	667	98561	94310	85233	1063	1297	1301
Metabolism	Biosynthesis of other secondary metabolites	Stilbenoid, diarylheptanoid and gingerol biosynthesis	26153	23347	22034	473	432	583	12052	15506	9241	146	220	247	22789	23501	19865	476	987	524
Metabolism	Biosynthesis of other secondary metabolites	Isoquinoline alkaloid biosynthesis	1406	1398	1027	19	60	50	2754	3825	2179	59	44	38	939	914	714	56	123	60
Metabolism	Biosynthesis of other secondary metabolites	Tropane, piperidine and pyridine alkaloid biosynthesis	113982	104808	89527	1025	2207	1897	80383	101285	57012	1033	893	1062	101067	101399	86765	1411	1614	917
Metabolism	Biosynthesis of other secondary metabolites	Betalain biosynthesis	314	351	269	19	53	44	135	197	270	18	18	44	361	406	340	46	108	60
Genetic Information Processing	Translation	Aminoacyl-tRNA biosynthesis	1608361	1484550	1306581	15948	37451	30947	1006467	1264163	730801	14251	16044	16399	1556743	1561007	1355419	22523	23226	14658
Metabolism	Xenobiotics biodegradation and metabolism	Metabolism of xenobiotics by cytochrome P450	528608	482459	422431	5001	7938	8667	324568	409739	239625	3826	3022	4054	448838	456573	385049	5009	6642	3236
Metabolism	Xenobiotics biodegradation and metabolism	Drug metabolism - cytochrome P450	542986	496201	434692	5125	8137	8894	331161	418282	245612	3963	3121	4189	464524	472305	398590	5146	6870	3351
Metabolism	Xenobiotics biodegradation and metabolism	Drug metabolism - other enzymes	288142	271990	234963	2974	7397	6067	204881	252716	145597	2952	3083	3263	271979	276194	239350	4770	4668	3323
Metabolism	Xenobiotics biodegradation and metabolism	Steroid degradation	7693	7446	7870	108	297	253	2390	3174	2949	115	54	145	10831	10705	9779	279	303	167
Metabolism	Lipid metabolism	Biosynthesis of unsaturated fatty acids	478036	438353	384272	4594	9239	8956	294314	370698	218005	4284	3735	4772	441970	444738	381598	6449	7507	4202
Metabolism	Metabolism of terpenoids and polyketides	Biosynthesis of ansamycins	118898	109367	94910	1397	2807	2781	73247	94811	53078	1383	1743	1540	103765	106227	90910	1787	1924	1254
Metabolism	Metabolism of terpenoids and polyketides	Biosynthesis of siderophore group nonribosomal peptides	17758	17954	15249	176	583	428	17200	20882	15187	204	227	325	14239	15091	13028	404	423	314
Metabolism	Metabolism of terpenoids and polyketides	Nonribosomal peptide structures	33032	30248	27056	294	359	413	23178	28735	15961	197	193	236	22148	23331	19207	172	215	130
Metabolism	Metabolism of terpenoids and polyketides	Biosynthesis of vancomycin group antibiotics	70900	64740	56896	699	1856	1347	49349	60455	34037	647	735	756	69865	68084	60352	1139	1176	780
Metabolism	Global and overview maps	Metabolic pathways	34954005	32186464	28160769	343449	720851	647351	22480592	28281898	16374197	308758	294762	338846	32925620	33082344	28514334	456184	502743	307857
Metabolism	Global and overview maps	Biosynthesis of secondary metabolites	15136194	13927475	12255748	152164	315183	285025	9368662	11818627	6892481	132751	130828	147332	14438106	14484232	12535554	205255	223636	138077
Metabolism	Global and overview maps	Microbial metabolism in diverse environments	11447246	10518194	9182568	111984	232121	210331	7379711	9323903	5396932	99430	88676	109918	10093449	10236957	8738462	142921	167352	96621
Metabolism	Global and overview maps	Biosynthesis of antibiotics	11233809	10325790	9100679	113191	237764	212797	6937138	8750158	5099410	98076	98187	109715	10580999	10635927	9194871	151850	166695	102301
Metabolism	Global and overview maps	Carbon metabolism	6020289	5530080	4854128	59551	132005	115538	3677164	4648373	2702445	52531	49159	59365	5501113	5566202	4779784	81400	90010	53701
Metabolism	Global and overview maps	2-Oxocarboxylic acid metabolism	1537233	1409706	1243813	15185	35177	28941	956239	1206528	705167	13443	13598	15377	1468015	1470944	1274040	21183	22904	14425
Metabolism	Global and overview maps	Fatty acid metabolism	2017255	1846490	1628791	18957	34648	35588	1219164	1537096	894837	15659	13156	17699	1774952	1801574	1539607	24588	29393	16406
Metabolism	Global and overview maps	Degradation of aromatic compounds	764762	702766	605587	6865	13016	13301	543613	681885	404314	7012	5365	7468	583826	599755	499994	8580	12194	6375
Metabolism	Global and overview maps	Biosynthesis of amino acids	6624998	6096673	5371393	66941	146230	127065	4182305	5264720	3062139	59219	60454	66478	6281067	6313688	5464633	90663	96801	61623
Human Diseases	Drug resistance: Antimicrobial	beta-Lactam resistance	796143	729386	641112	8300	15695	15575	469313	593179	347645	7308	7410	8283	723028	732688	630015	10781	12961	8031
Human Diseases	Drug resistance: Antimicrobial	Vancomycin resistance	374255	347713	305818	3857	7779	7538	237670	295892	173108	3568	4006	3838	387061	385301	336382	5626	5515	3661
Human Diseases	Drug resistance: Antimicrobial	Cationic antimicrobial peptide (CAMP) resistance	559585	517058	445724	4612	8697	8742	371630	468337	268234	4522	4323	4824	521825	521490	449434	5631	6866	4443
Human Diseases	Drug resistance: Antineoplastic	Platinum drug resistance	587918	535031	468038	5026	8063	8979	362491	459071	261188	4043	2851	4241	488158	499068	418490	4975	6244	2878
Environmental Information Processing	Membrane transport	ABC transporters	7467995	6901291	5952659	78626	160533	148403	5312658	6743175	3852697	80263	66441	82854	6612035	6743291	5727842	97185	111027	66969
Environmental Information Processing	Signal transduction	Two-component system	6873657	6306062	5457854	62211	115559	116417	4450693	5677583	3207643	55452	45939	59845	5983278	6073567	5156265	73385	84980	48052
Cellular Processes	Cellular community - prokaryotes	Quorum sensing	4075786	3730217	3250896	41587	79605	79553	2544425	3252030	1867926	39171	35524	42003	3536708	3614682	3064892	51951	62360	35938
Cellular Processes	Cell motility	Bacterial chemotaxis	1782228	1645491	1391206	15856	28568	28871	1335687	1697115	915009	15937	11756	16033	1480199	1518550	1270366	17084	21529	11073
Cellular Processes	Cell motility	Flagellar assembly	2030283	1864741	1591172	17250	30572	32277	1269491	1622508	898781	15803	12766	16784	1675823	1723523	1443753	20774	26202	13419
Environmental Information Processing	Membrane transport	Phosphotransferase system (PTS)	177782	180534	155393	2283	5736	5805	142594	178333	104001	2732	4307	2724	151169	165233	141481	3539	3329	2535
Genetic Information Processing	Translation	Ribosome biogenesis in eukaryotes	109760	100120	87924	1048	3469	1881	67353	86438	49393	850	860	949	105063	104974	90580	1324	1360	834
Genetic Information Processing	Translation	Ribosome	3320267	3063390	2706632	33477	79018	64557	2059529	2579687	1500154	29255	34631	33578	3267398	3270341	2846586	47533	47565	30599
Genetic Information Processing	Translation	RNA transport	114708	106308	91308	949	5649	1993	75890	95749	54897	1063	1069	1357	127481	124706	109041	1634	1460	1189
Genetic Information Processing	Folding, sorting and degradation	RNA degradation	890593	821153	725051	9082	19588	17459	548636	690467	403734	8335	8355	9112	891508	889490	776299	12836	13607	8769
Genetic Information Processing	Transcription	RNA polymerase	235541	217262	191839	2427	7706	4714	146016	183360	106762	2141	2408	2556	239596	238590	208229	3463	3384	2180
Genetic Information Processing	Transcription	Basal transcription factors	2111	2052	2212	76	1246	154	496	716	677	34	34	203	3594	3609	3312	181	175	116
Genetic Information Processing	Replication and repair	DNA replication	990619	913816	804888	9797	21826	18556	608098	767225	445058	8255	9678	9513	929676	937813	811008	13380	13800	8676
Genetic Information Processing	Folding, sorting and degradation	Proteasome	25272	25057	23242	670	2542	1163	22896	27676	16620	489	556	692	32209	32829	30016	1089	1070	702
Genetic Information Processing	Folding, sorting and degradation	Protein export	957127	881685	776332	9626	20125	18133	579392	730136	426752	8136	9289	9211	927276	929872	806762	13383	13988	8881
Environmental Information Processing	Membrane transport	Bacterial secretion system	1792072	1632449	1429392	15958	28416	29083	985078	1272570	747339	12422	12731	14473	1599375	1605899	1373201	19350	25426	14146
Organismal Systems	Endocrine system	PPAR signaling pathway	542385	494466	437907	4993	8441	8913	320593	405123	237054	3836	3379	4351	477628	483534	412550	6401	8514	4761
Genetic Information Processing	Replication and repair	Base excision repair	784220	721078	632155	8003	16169	14650	466727	593050	343573	6406	7131	7401	737741	741528	641439	10923	12277	7524
Genetic Information Processing	Replication and repair	Nucleotide excision repair	540952	499049	442300	5672	12546	10522	314866	399363	233320	4547	5537	5218	532456	533928	465063	7950	8553	5462
Genetic Information Processing	Replication and repair	Mismatch repair	1110038	1024945	901874	10798	21868	20644	686904	867197	503100	9535	11310	10578	1061159	1067848	924095	15015	15544	9953
Genetic Information Processing	Replication and repair	Homologous recombination	1275582	1178260	1035107	12645	24832	23952	813435	1020933	589741	11030	13034	12308	1206508	1215032	1051127	17535	17966	11486
Genetic Information Processing	Replication and repair	Non-homologous end-joining	55659	50566	44998	820	2145	1529	23189	30895	19139	545	422	790	51206	51631	45330	1183	1565	827
Environmental Information Processing	Signal transduction	MAPK signaling pathway - yeast	68274	62712	51637	534	932	915	31414	41311	23305	389	279	485	58208	58360	49507	622	889	444
Environmental Information Processing	Signal transduction	MAPK signaling pathway - fly	67344	61882	54509	704	1348	1266	39736	49252	29500	602	441	677	72878	71440	62874	957	971	547
Environmental Information Processing	Signal transduction	Calcium signaling pathway	1810	1572	1440	80	70	108	3177	4739	2269	71	63	72	965	1035	769	24	38	14
Environmental Information Processing	Signal transduction	cAMP signaling pathway	1407	1257	1229	76	103	85	322	463	303	20	19	22	1449	1632	1403	141	165	103
Environmental Information Processing	Signaling molecules and interaction	Cytokine-cytokine receptor interaction	59186	54581	48219	597	1397	1148	36643	45897	26684	522	619	597	58452	58421	50908	850	845	545
Environmental Information Processing	Signal transduction	HIF-1 signaling pathway	196046	181392	161786	2202	5341	4467	119422	148759	89194	2164	2132	2489	212746	211857	186792	3719	3409	2139
Environmental Information Processing	Signal transduction	FoxO signaling pathway	168657	154071	131758	1552	2818	2744	87358	112330	65249	1196	862	1415	161914	160023	138793	1985	2310	1195
Environmental Information Processing	Signal transduction	Phosphatidylinositol signaling system	213598	196283	170316	2000	4072	3784	137700	175392	100015	1811	1725	1925	206139	205963	177787	2672	2829	1663
Environmental Information Processing	Signal transduction	Phospholipase D signaling pathway	45824	42248	35806	355	603	632	31046	40465	22526	323	236	294	43173	43128	36736	415	485	253
Cellular Processes	Cell growth and death	Cell cycle - yeast	7528	7350	5599	28	104	92	10638	12544	6790	101	51	75	5635	5712	4600	27	18	8
Cellular Processes	Cell growth and death	Cell cycle - Caulobacter	1004245	921942	817622	11310	22794	22389	603921	763777	444479	9809	9495	11158	959298	970754	837853	14751	15836	9192
Cellular Processes	Cell growth and death	Meiosis - yeast	59296	54098	46232	568	1035	1022	31384	40419	22401	705	522	836	60790	59633	51706	853	1493	779
Cellular Processes	Cell growth and death	p53 signaling pathway	175767	160444	138592	1439	2459	2750	111254	142215	77463	1304	845	1421	138593	144025	119812	1548	1889	855
Genetic Information Processing	Folding, sorting and degradation	Ubiquitin mediated proteolysis	34728	31572	28625	421	808	869	21205	27162	15897	405	383	454	28930	30423	25601	486	583	286
Genetic Information Processing	Folding, sorting and degradation	Sulfur relay system	625529	578230	500832	6172	15122	11996	407254	514429	298637	5829	5507	6525	634439	631847	547530	8986	8965	5559
Genetic Information Processing	Folding, sorting and degradation	Protein processing in endoplasmic reticulum	94836	86704	76489	846	4120	2016	53517	68425	40373	901	839	1282	98032	97396	85072	1525	1447	924
Cellular Processes	Transport and catabolism	Lysosome	35415	34082	28850	151	389	245	18514	22528	15549	341	632	337	47382	44540	40793	289	495	1022
Cellular Processes	Transport and catabolism	Peroxisome	585545	534426	469152	5463	9805	9763	327831	418473	243627	4274	3724	4927	510333	517784	442334	6766	8380	4819
Environmental Information Processing	Signal transduction	PI3K-Akt signaling pathway	82307	75005	64943	653	1415	1261	47639	60889	35088	572	438	649	79625	78977	68256	919	982	588
Environmental Information Processing	Signal transduction	AMPK signaling pathway	173069	158072	136015	1319	2987	2614	105711	135108	75920	1348	1174	1369	178966	174468	152718	1930	2044	1378
Cellular Processes	Cell growth and death	Apoptosis	189907	173497	149419	1607	2886	2978	118880	151966	83621	1420	987	1580	149414	154947	128888	1643	2074	1026
Organismal Systems	Aging	Longevity regulating pathway	135618	124594	106146	1238	2280	2181	71150	90563	52805	991	720	1162	131086	129800	112381	1579	1860	991
Organismal Systems	Aging	Longevity regulating pathway - worm	686243	627631	552414	6593	11693	11811	414682	521825	306425	5537	4716	5723	662229	661886	569307	8000	9031	4984
Organismal Systems	Aging	Longevity regulating pathway - multiple species	288830	265203	227699	2726	4928	4891	153229	195850	113696	2481	1982	2802	291922	288255	249725	3646	4569	2546
Cellular Processes	Cell growth and death	Apoptosis - fly	237407	217172	187650	1886	3377	3585	157036	198183	109663	1792	1334	1875	196250	201744	168980	2043	2423	1158
Cellular Processes	Cell growth and death	Apoptosis - multiple species	175767	160444	138592	1439	2459	2750	111254	142215	77463	1304	845	1421	138593	144025	119812	1548	1889	855
Organismal Systems	Circulatory system	Cardiac muscle contraction	162306	147429	128494	1315	2132	2297	100584	128186	71295	1033	717	1130	128040	132203	110210	1173	1353	577
Organismal Systems	Immune system	Antigen processing and presentation	48146	44440	38270	351	733	745	31259	38928	22513	404	296	424	48324	48233	41548	549	519	372
Organismal Systems	Endocrine system	Renin-angiotensin system	58903	53913	46892	563	579	779	28325	35720	20345	221	261	270	56771	55410	48278	472	675	357
Organismal Systems	Immune system	NOD-like receptor signaling pathway	48155	44920	38361	351	733	745	31268	38984	22563	404	296	424	48329	48566	41602	549	519	372
Organismal Systems	Immune system	RIG-I-like receptor signaling pathway	1991	2503	1826	6	29	24	1993	2822	1642	32	19	21	1515	2075	1474	7	8	8
Organismal Systems	Environmental adaptation	Plant-pathogen interaction	409625	375145	327631	3953	6812	7145	252952	323492	184317	3382	2881	3640	367522	371536	318005	4462	5013	2821
Organismal Systems	Nervous system	Glutamatergic synapse	162411	152010	130866	1894	3792	3376	132511	162246	91071	1683	1582	1871	154580	157484	134531	2431	2741	1722
Organismal Systems	Nervous system	Serotonergic synapse	18389	17578	14904	150	259	283	7575	10078	6844	155	117	182	18396	18403	15833	183	336	175
Organismal Systems	Nervous system	GABAergic synapse	162318	152899	130989	1899	3803	3383	132560	162395	91371	1683	1631	1871	154590	158158	134686	2451	2787	1796
Organismal Systems	Nervous system	Dopaminergic synapse	18389	17578	14904	150	259	283	7575	10078	6844	155	117	182	18396	18403	15833	183	336	175
Organismal Systems	Endocrine system	Insulin signaling pathway	112151	102738	90123	1209	2432	2290	65028	84543	48980	1034	1034	1138	119540	116709	102799	1662	1825	1232
Organismal Systems	Endocrine system	Progesterone-mediated oocyte maturation	48146	44440	38270	351	733	745	31259	38928	22513	404	296	424	48324	48233	41548	549	519	372
Organismal Systems	Endocrine system	Estrogen signaling pathway	48146	44440	38270	351	733	745	31259	38928	22513	404	296	424	48324	48233	41548	549	519	372
Organismal Systems	Endocrine system	Prolactin signaling pathway	6061	6629	5980	206	386	335	5484	7751	4338	184	238	173	13422	13145	11942	298	278	275
Organismal Systems	Endocrine system	Thyroid hormone synthesis	120408	109985	96640	1053	1838	1962	64600	81928	48701	808	628	894	105942	107906	90595	1162	1520	782
Organismal Systems	Endocrine system	Adipocytokine signaling pathway	198081	179844	161212	2003	3246	3526	106458	136363	80549	1373	1379	1668	172623	175469	150672	2681	3614	2133
Organismal Systems	Endocrine system	Glucagon signaling pathway	246837	228673	205524	3104	6457	6122	133359	172378	103881	2855	2765	3174	267152	265239	234901	4876	4671	2944
Human Diseases	Endocrine and metabolic diseases	Type II diabetes mellitus	68896	64310	55456	653	1449	1353	40614	52083	30771	689	722	695	72153	71685	62228	1036	920	650
Human Diseases	Endocrine and metabolic diseases	Insulin resistance	138308	127669	112563	1512	3138	2797	86261	108780	63253	1358	1658	1523	144601	142074	125303	2129	2190	1471
Human Diseases	Endocrine and metabolic diseases	Non-alcoholic fatty liver disease (NAFLD)	337746	307630	266840	2754	4845	5069	212160	270893	148933	2355	1574	2589	266508	276136	229927	2729	3245	1433
Human Diseases	Endocrine and metabolic diseases	Type I diabetes mellitus	65487	61893	53926	807	1587	1575	40695	51562	31056	717	854	794	66134	67884	58252	1325	1606	1049
Organismal Systems	Excretory system	Proximal tubule bicarbonate reclamation	85316	77857	66781	710	1461	1289	46579	60230	35170	566	673	618	87191	85534	73862	974	1173	629
Organismal Systems	Digestive system	Salivary secretion	8159	7556	6995	41	115	119	2546	3284	2174	37	76	30	6833	6521	6145	67	74	89
Organismal Systems	Digestive system	Carbohydrate digestion and absorption	8159	7556	7005	41	115	119	2546	3284	2250	37	87	30	6833	6521	6145	67	74	120
Organismal Systems	Digestive system	Protein digestion and absorption	13448	12336	11136	38	36	59	4823	5289	3289	13	55	26	12564	12185	11060	33	49	83
Organismal Systems	Digestive system	Mineral absorption	44508	41158	34586	351	508	537	30766	38535	21999	386	255	282	46834	46105	39576	337	362	169
Human Diseases	Neurodegenerative diseases	Alzheimer disease	406655	372072	322545	3365	5838	6259	261137	331807	183892	2941	2401	3211	331850	342547	287129	3625	4146	2015
Human Diseases	Neurodegenerative diseases	Parkinson disease	337746	307630	266840	2754	4598	5057	212160	270893	148933	2355	1574	2566	266508	276136	229927	2724	3245	1433
Human Diseases	Neurodegenerative diseases	Amyotrophic lateral sclerosis (ALS)	279540	255352	218368	2273	3800	4179	156964	202832	112581	1909	1286	2098	230519	236161	197869	2461	3131	1504
Human Diseases	Neurodegenerative diseases	Huntington disease	524215	478219	415172	4367	7702	8048	315586	402018	226400	3694	2598	4056	442400	452674	380380	4663	5537	2690
Human Diseases	Neurodegenerative diseases	Prion diseases	35499	32196	28139	300	409	514	14296	19306	11813	216	162	192	33718	33776	28550	291	353	205
Human Diseases	Substance dependence	Cocaine addiction	18389	17578	14904	150	259	283	7575	10078	6844	155	117	182	18396	18403	15833	183	336	175
Human Diseases	Substance dependence	Amphetamine addiction	18389	17578	14904	150	259	283	7575	10078	6844	155	117	182	18396	18403	15833	183	336	175
Human Diseases	Substance dependence	Alcoholism	18389	17578	14904	150	259	283	7575	10078	6844	155	117	182	18396	18403	15833	183	336	175
Cellular Processes	Cellular community - prokaryotes	Biofilm formation - Vibrio cholerae	203643	188774	159229	1369	2735	2621	134311	171807	96581	1283	1119	1300	182461	184075	156776	1836	1700	1063
Human Diseases	Infectious diseases: Bacterial	Epithelial cell signaling in Helicobacter pylori infection	133558	125046	105171	891	1891	1967	94451	117936	66171	1072	719	1124	108276	112361	93816	1250	1497	1056
Human Diseases	Infectious diseases: Bacterial	Salmonella infection	177697	162780	140894	1565	2887	2857	122623	154581	88757	1500	1173	1563	154346	156928	133061	1799	2142	1088
Human Diseases	Infectious diseases: Bacterial	Pertussis	106383	99655	83728	718	1525	1459	110523	132481	74683	773	690	948	82475	84484	70646	837	1070	648
Human Diseases	Infectious diseases: Bacterial	Legionellosis	433160	396497	348097	4103	8275	7711	274593	348600	197511	3601	3090	4061	370942	380286	322280	4945	5858	3117
Human Diseases	Infectious diseases: Parasitic	Chagas disease (American trypanosomiasis)	26522	24328	22484	292	531	558	10299	13556	8334	150	120	245	23488	23783	20570	298	354	169
Human Diseases	Infectious diseases: Parasitic	African trypanosomiasis	20998	19046	17916	270	772	565	9867	12662	8383	172	140	279	20358	20474	17942	310	387	173
Human Diseases	Infectious diseases: Parasitic	Toxoplasmosis	175767	160444	138592	1439	2459	2750	111254	142215	77463	1304	845	1421	138593	144025	119812	1548	1889	855
Human Diseases	Infectious diseases: Parasitic	Amoebiasis	29549	28302	24880	324	607	637	22899	28984	16243	341	286	292	28903	29401	25407	350	452	337
Human Diseases	Infectious diseases: Bacterial	Staphylococcus aureus infection	11971	14514	11455	93	239	199	8236	11023	7378	207	315	154	12218	14363	11342	63	66	16
Human Diseases	Infectious diseases: Bacterial	Tuberculosis	384302	353627	308623	3778	7647	7302	240043	304348	175093	3576	3233	3836	388231	387831	334868	5254	5622	3324
Human Diseases	Infectious diseases: Viral	Hepatitis B	175767	160444	138592	1439	2706	2762	111254	142215	77463	1304	845	1444	138593	144025	119812	1553	1889	855
Human Diseases	Infectious diseases: Viral	Influenza A	175850	160501	138645	1439	2706	2762	111281	142283	77486	1304	845	1444	138803	144189	119952	1553	1889	855
Human Diseases	Infectious diseases: Viral	Herpes simplex virus 1 infection	175767	160444	138592	1439	2953	2774	111254	142215	77463	1304	845	1467	138593	144025	119812	1558	1889	855
Human Diseases	Cancers: Overview	Pathways in cancer	281655	257577	222738	2359	4357	4576	170215	217592	121718	2182	1564	2434	244352	248846	210683	2909	3237	1674
Human Diseases	Cancers: Overview	Viral carcinogenesis	68896	64310	55446	653	2394	1417	40614	52083	30695	689	711	856	72153	71685	62228	1071	920	619
Human Diseases	Cancers: Overview	Chemical carcinogenesis	482537	439782	385258	4193	6331	7181	287751	363176	211195	3091	2326	3221	407002	413713	348211	3940	5109	2407
Human Diseases	Cancers: Overview	Proteoglycans in cancer	59792	55174	48628	620	1447	1181	36849	46059	27037	565	642	610	64984	64076	56202	910	861	571
Human Diseases	Cancers: Overview	MicroRNAs in cancer	58135	55134	48286	618	1344	1328	41779	50619	31199	675	466	594	74045	73135	63557	1053	1089	729
Human Diseases	Cancers: Specific types	Colorectal cancer	175767	160444	138592	1439	2459	2750	111254	142215	77463	1304	845	1421	138593	144025	119812	1548	1889	855
Human Diseases	Cancers: Specific types	Renal cell carcinoma	57724	52665	45848	569	1114	1073	27702	36437	21742	474	423	558	57044	56383	49079	807	828	447
Human Diseases	Cancers: Specific types	Prostate cancer	460297	419027	367716	3938	6337	6974	282496	355784	206238	3143	2302	3244	397889	403276	340226	3976	4874	2395
Human Diseases	Cancers: Specific types	Bladder cancer	29284	27050	22894	360	502	588	24529	31217	17500	287	247	230	23287	24419	20103	345	490	287
Human Diseases	Cancers: Specific types	Small cell lung cancer	175767	160444	138592	1439	2459	2750	111254	142215	77463	1304	845	1421	138593	144025	119812	1548	1889	855
Human Diseases	Cancers: Overview	Central carbon metabolism in cancer	457987	422940	373749	4690	9789	9077	277778	353930	204788	4562	4437	4970	458726	458679	399980	6922	6847	4412
Human Diseases	Cancers: Overview	Choline metabolism in cancer	48986	45240	37798	355	603	632	31641	41414	22965	323	236	294	45347	45228	38483	415	485	253
Human Diseases	Immune diseases	Primary immunodeficiency	100264	93008	80309	1056	1425	1530	59607	75658	44004	629	626	642	92897	93480	80497	1141	1350	843
Human Diseases	Cardiovascular diseases	Viral myocarditis	175767	160444	138592	1439	2459	2750	111254	142215	77463	1304	845	1421	138593	144025	119812	1548	1889	855

## Sheet: Table S2
Class1	Class2	CPF: mean rel.freq.(%)	CPF: std.dev.(%)	YYF: mean rel.freq.(%)	YYF: std.dev.(%)	p-values	p-values (corrected)	Difference between means	95.0% lower CI	95.0% upper CI	Note
Organismal Systems	Digestive system	0.0362466	0.000202511	0.0296163	0.000249218	1.18657e-05	0.000545824	0.00663029	0.0059893	0.00727128	-
Environmental Information Processing	Membrane transport	4.17164	0.020657	4.50826	0.0162921	8.01012e-05	0.00184233	-0.336613	-0.389388	-0.283838	-
Organismal Systems	Aging	0.489495	0.00182578	0.448414	0.00273585	0.000155113	0.00237839	0.0410807	0.0342305	0.0479309	-
Human Diseases	Immune diseases	0.0454804	0.000257899	0.0425139	0.000196243	0.000307303	0.00353399	0.00296653	0.00231206	0.00362101	-
Metabolism	Metabolism of other amino acids	1.74555	0.00242996	1.71896	0.00240641	0.000388953	0.00357837	0.0265901	0.0198758	0.0333043	-
Organismal Systems	Excretory system	0.0380386	0.000483912	0.0334588	0.000477872	0.000679245	0.00390566	0.00457987	0.00324459	0.00591515	-
Human Diseases	Cancers: Overview	0.644851	0.000482833	0.620693	0.00135298	0.000517739	0.00396933	0.0241587	0.0205289	0.0277884	-
Human Diseases	Infectious diseases: Bacterial	0.552505	0.00239031	0.590579	0.00376347	0.000666432	0.00437941	-0.0380745	-0.047488	-0.028661	-
Metabolism	Metabolism of terpenoids and polyketides	1.23475	0.00696482	1.16917	0.00756184	0.000862697	0.00440934	0.0655774	0.0453404	0.0858144	-
Genetic Information Processing	Replication and repair	2.11332	0.00703364	2.03608	0.00323859	0.00107682	0.00495339	0.0772456	0.0591406	0.0953506	-
Organismal Systems	Endocrine system	0.617478	0.00306773	0.557434	0.00607275	0.0011868	0.00496299	0.0600438	0.0446108	0.0754769	-
Organismal Systems	Nervous system	0.162605	0.00157426	0.191758	0.00326504	0.00175062	0.00671072	-0.0291538	-0.0375025	-0.0208051	-
Cellular Processes	Transport and catabolism	0.274133	0.000589868	0.244503	0.00253052	0.00242535	0.00796902	0.0296298	0.0224207	0.0368388	-
Human Diseases	Drug resistance: Antimicrobial	0.766181	0.000636699	0.752655	0.00158158	0.00270337	0.00829035	0.0135262	0.00936713	0.0176853	-
Metabolism	Metabolism of cofactors and vitamins	3.80542	0.00515079	3.8877	0.010437	0.0023888	0.00845267	-0.0822748	-0.108878	-0.0556714	-
Environmental Information Processing	Signaling molecules and interaction	0.0263554	0.0001307	0.0255174	7.37597e-05	0.00351589	0.0101082	0.000838084	0.000509646	0.00116652	-
Metabolism	Lipid metabolism	2.48497	0.00463179	2.39832	0.0117195	0.00403971	0.010931	0.0866444	0.0557312	0.117558	-
Genetic Information Processing	Transcription	0.105805	0.000632549	0.102265	0.000387711	0.00480016	0.0116214	0.00354053	0.00195768	0.00512338	-
Genetic Information Processing	Translation	2.29125	0.00994786	2.23315	0.00555925	0.00472362	0.0120715	0.058099	0.0330818	0.0831163	-
Metabolism	Amino acid metabolism	7.71532	0.0109284	7.78255	0.0133535	0.00591766	0.0136106	-0.0672271	-0.101632	-0.0328218	-
Genetic Information Processing	Folding, sorting and degradation	1.1671	0.00322893	1.14246	0.00498348	0.00673686	0.0147569	0.0246345	0.0121672	0.0371018	-
Metabolism	Energy metabolism	4.25063	0.00240552	4.31042	0.0106043	0.0121218	0.0253455	-0.0597933	-0.0900932	-0.0294934	-
Human Diseases	Substance dependence	0.0247924	0.000416594	0.0174049	0.0016148	0.0179359	0.0358717	0.00738745	0.00284223	0.0119327	-
Human Diseases	Drug resistance: Antineoplastic	0.258339	0.00136463	0.252213	0.0017632	0.0199095	0.0381598	0.00612679	0.00163882	0.0106148	-
Organismal Systems	Development	2.54675e-05	5.15795e-06	5.24688e-06	1.76305e-06	0.0217479	0.0400162	2.02206e-05	6.28518e-06	3.41561e-05	-
Cellular Processes	Cell motility	1.67213	0.0230249	1.79618	0.0441975	0.0386834	0.0635513	-0.12405	-0.235962	-0.0121371	-
Organismal Systems	Environmental adaptation	0.180655	0.00050909	0.177233	0.0011758	0.0383443	0.0653274	0.00342238	0.000366843	0.00647793	-
Metabolism	Carbohydrate metabolism	8.19865	0.0220097	8.12744	0.0241939	0.0374024	0.0661734	0.0712124	0.00677395	0.135651	-
Human Diseases	Neurodegenerative diseases	0.694793	0.00545256	0.66744	0.0102677	0.0438384	0.0695368	0.0273529	0.00140823	0.0532976	-
Cellular Processes	Cell growth and death	0.81673	0.00156802	0.795748	0.00710562	0.0470996	0.0722193	0.0209819	0.00062001	0.0413438	-
Human Diseases	Infectious diseases: Parasitic	0.1119	0.000160124	0.107492	0.00146736	0.0496593	0.073688	0.00440818	1.59451e-05	0.00880041	-
Organismal Systems	Immune system	0.0436821	0.000449315	0.0448131	0.000170734	0.0562298	0.0808304	-0.00113095	-0.0023239	6.20051e-05	-
Human Diseases	Endocrine and metabolic diseases	0.26971	0.000706111	0.264781	0.00214577	0.0710706	0.0990681	0.00492916	-0.000903486	0.0107618	-
Human Diseases	Cancers: Specific types	0.394887	0.00230181	0.387761	0.00358792	0.0886179	0.119895	0.0071263	-0.00184855	0.0161012	-
Metabolism	Glycan biosynthesis and metabolism	0.949481	0.00372818	0.958012	0.00425196	0.100971	0.132705	-0.00853182	-0.0197091	0.00264544	-
Metabolism	Global and overview maps	39.7492	0.0389633	39.6227	0.0704154	0.109274	0.139628	0.126516	-0.050713	0.303745	-
Environmental Information Processing	Signal transduction	3.47569	0.0207918	3.52851	0.0298689	0.117757	0.1464	-0.0528234	-0.1278	0.0221533	-
Metabolism	Xenobiotics biodegradation and metabolism	2.58878	0.00735295	2.606	0.00978251	0.122944	0.148827	-0.0172169	-0.0419929	0.00755905	-
Human Diseases	Cardiovascular diseases	0.0816245	0.000657581	0.0785089	0.00192376	0.138244	0.163057	0.00311563	-0.00208186	0.00831312	-
Metabolism	Biosynthesis of other secondary metabolites	0.804639	0.00070111	0.81039	0.00364589	0.151092	0.173755	-0.00575029	-0.0163331	0.00483254	-
Organismal Systems	Circulatory system	0.0715041	0.000540437	0.0699019	0.00114455	0.176186	0.197672	0.00160222	-0.00133305	0.00453748	-
Metabolism	Nucleotide metabolism	2.75739	0.00639808	2.75001	0.00358861	0.245853	0.269268	0.00738255	-0.00870287	0.023468	-
Cellular Processes	Cellular community - prokaryotes	1.88498	0.00807751	1.88055	0.00975185	0.647407	0.692575	0.00443219	-0.0207714	0.0296358	-
Human Diseases	Infectious diseases: Viral	0.231236	0.00200614	0.230398	0.00588917	0.863561	0.902814	0.000837851	-0.0150819	0.0167576	-
Organismal Systems	Sensory system	0	0	0	0	1	1	0	0	0	degenerate case: variance of both groups is zero
Cellular Processes	Cellular community - eukaryotes	0	0	0	0	1	1.02222	0	0	0	degenerate case: variance of both groups is zero

## Sheet: Table S3
Class1	Class2	CPN: mean rel.freq.(%)	CPN: std.dev.(%)	YYN: mean rel.freq.(%)	YYN: std.dev.(%)	p-values	p-values (corrected)	Difference between means	95.0% lower CI	95.0% upper CI	Note
Human Diseases	Infectious diseases: Bacterial	0.507565	0.00851251	0.536373	0.00911367	0.0310924	1.43025	-0.0288073	-0.0533355	-0.00427911	-
Environmental Information Processing	Membrane transport	4.35405	0.0536145	4.65088	0.150396	0.0947743	2.17981	-0.296823	-0.700378	0.106732	-
